# Supplementary material
Source: PubMed Central journal article supplement (PMC3361997)

Supplemental Figure 1A

Cilium deficient

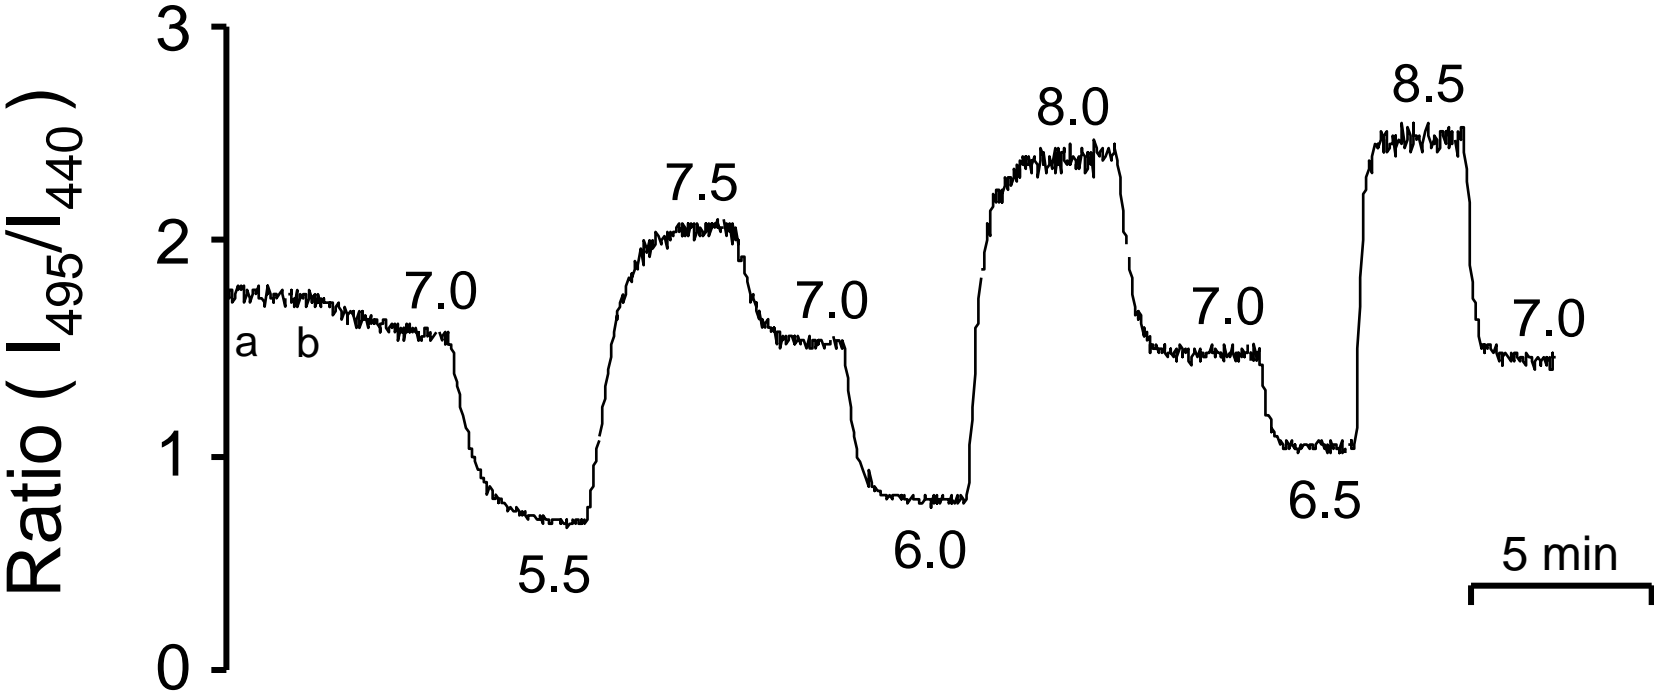

Supplemental Figure 1B

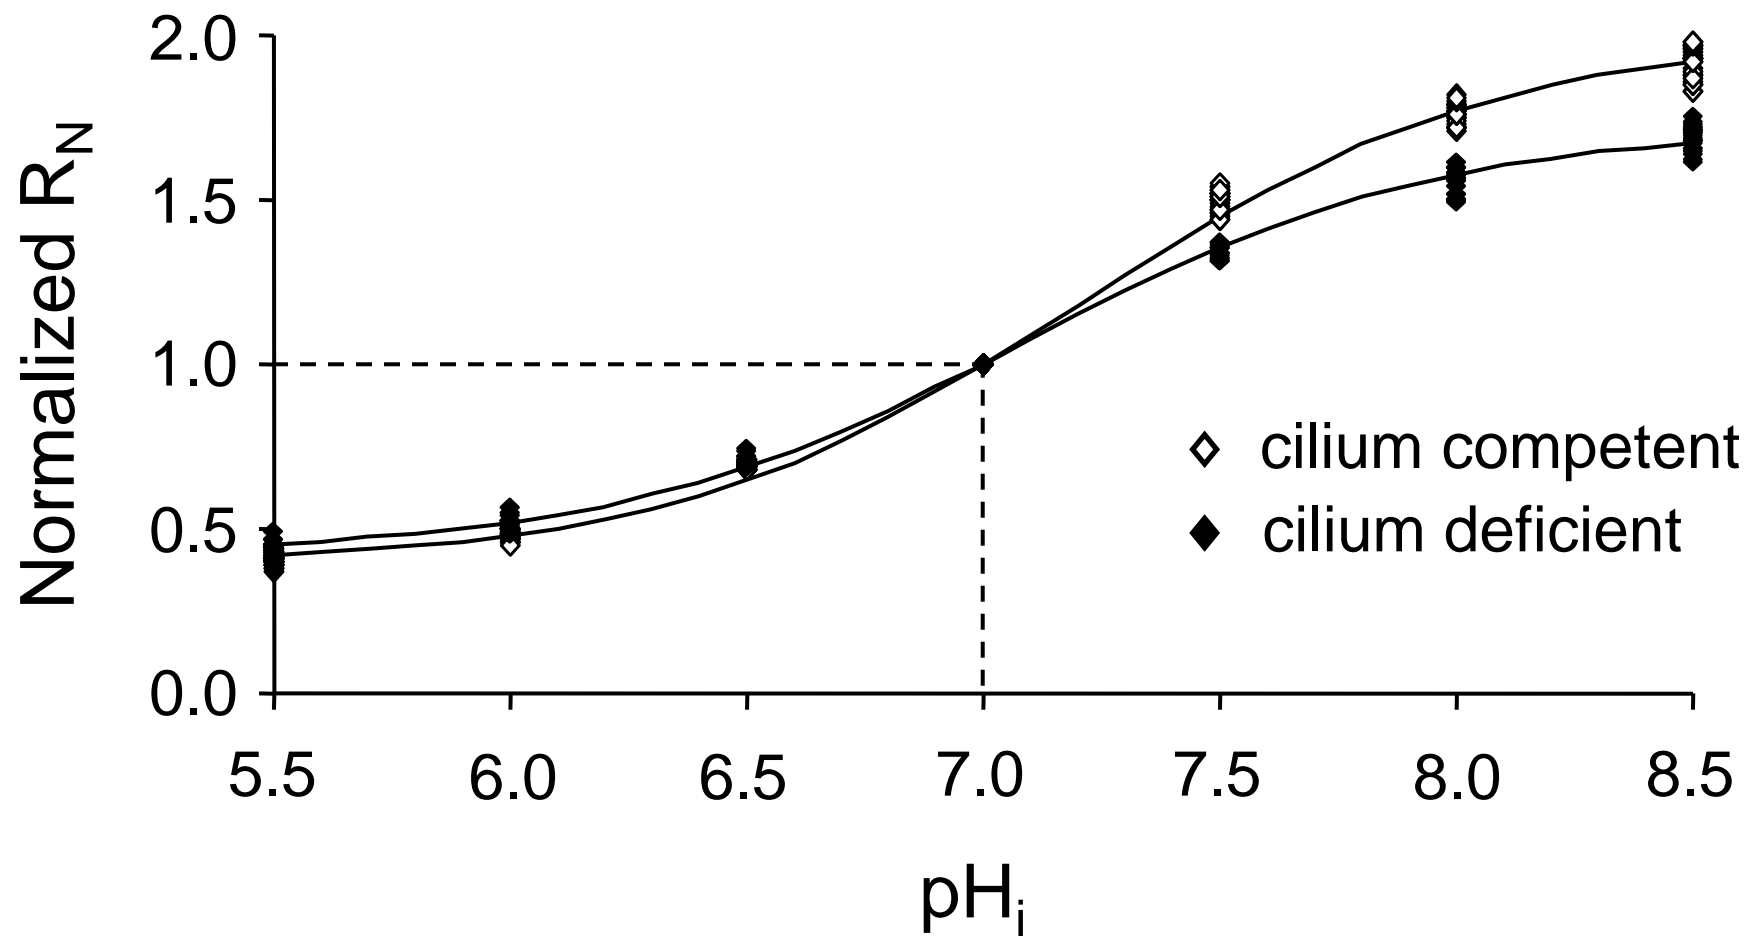

Supplemental Figure 2

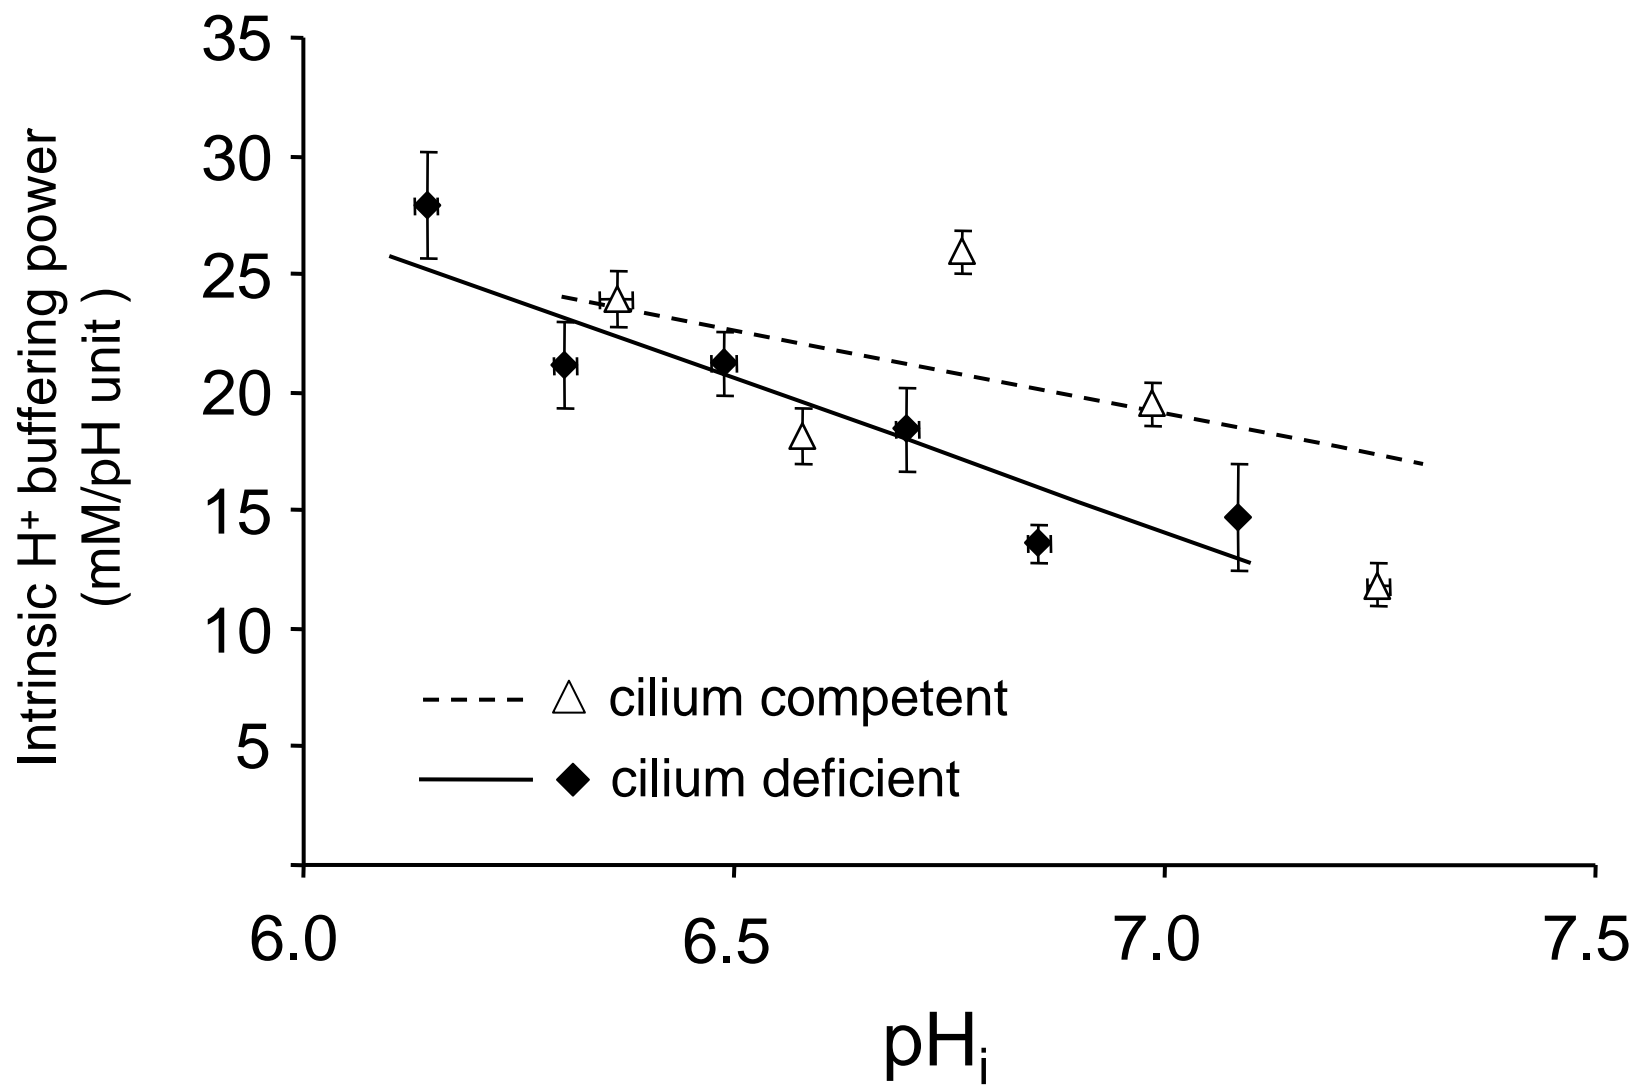

Supplemental Figure 3A

### Cilium competent

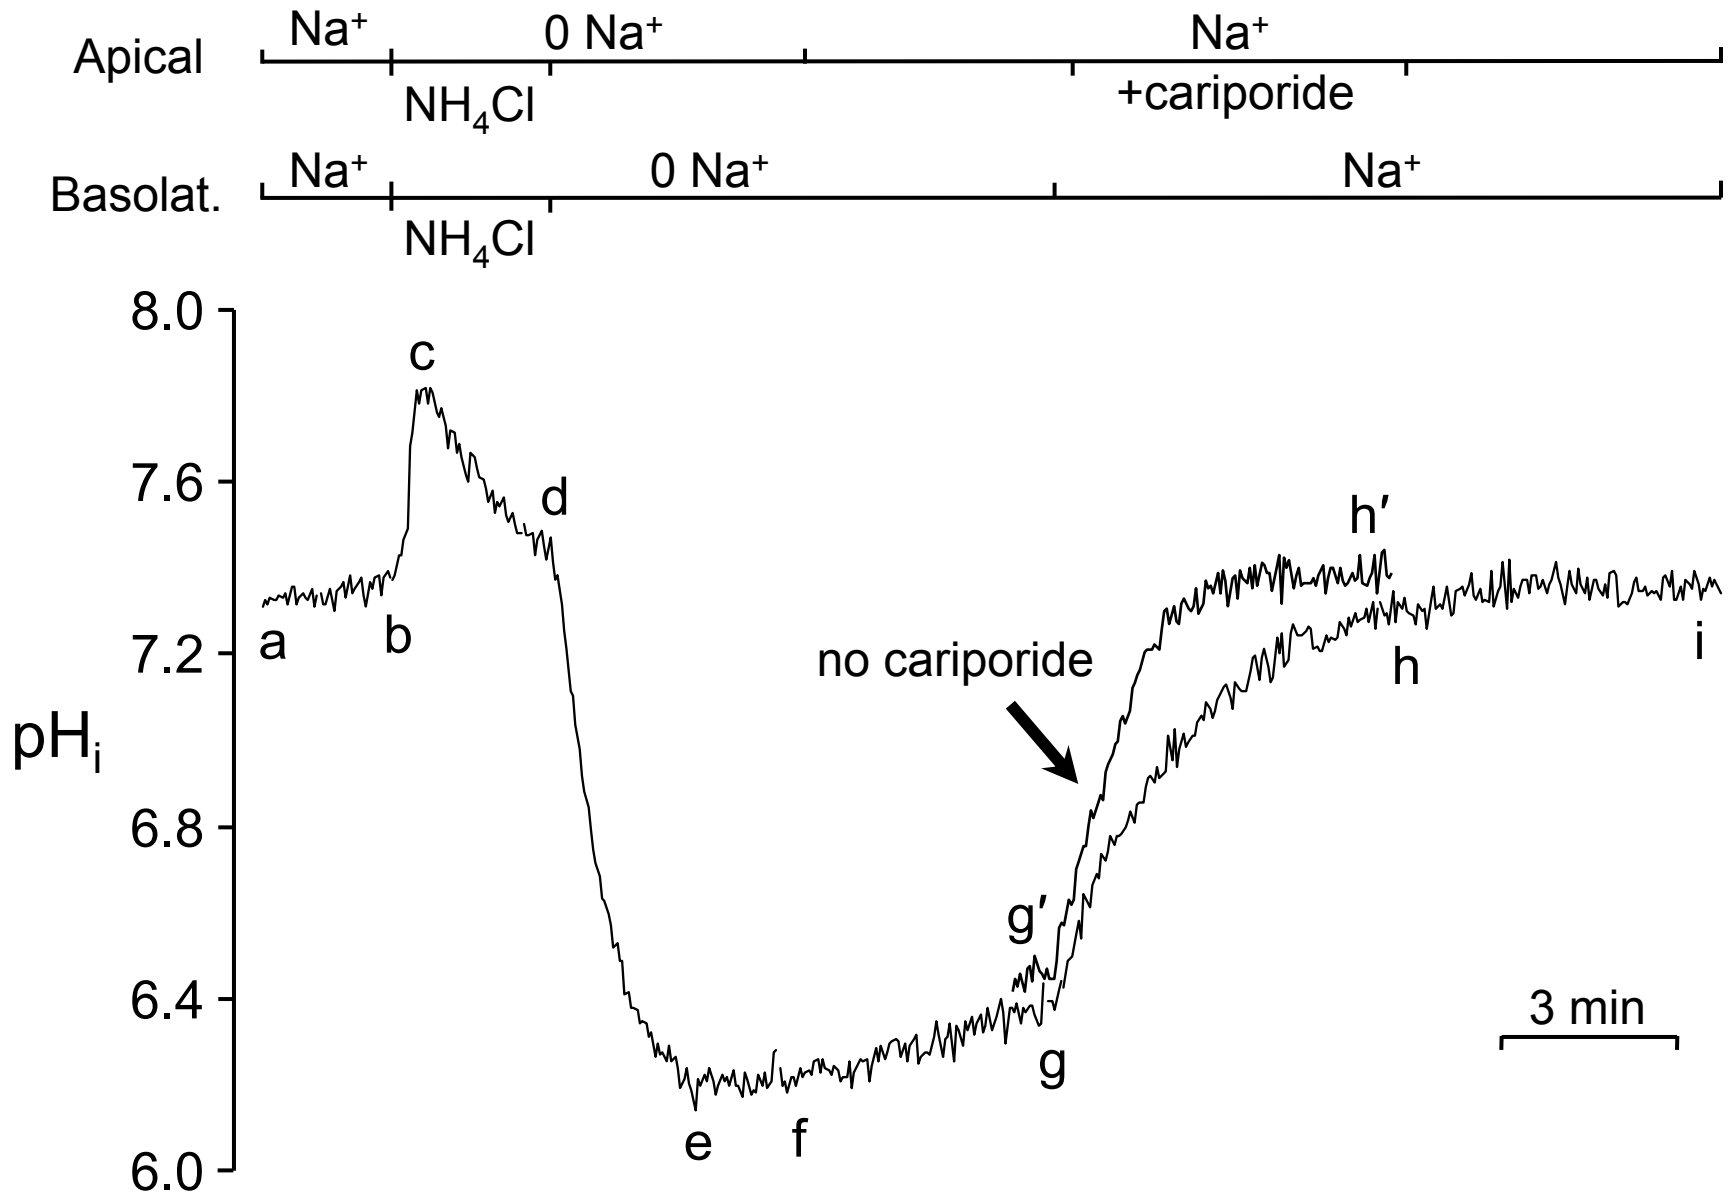

Supplemental Figure 3B

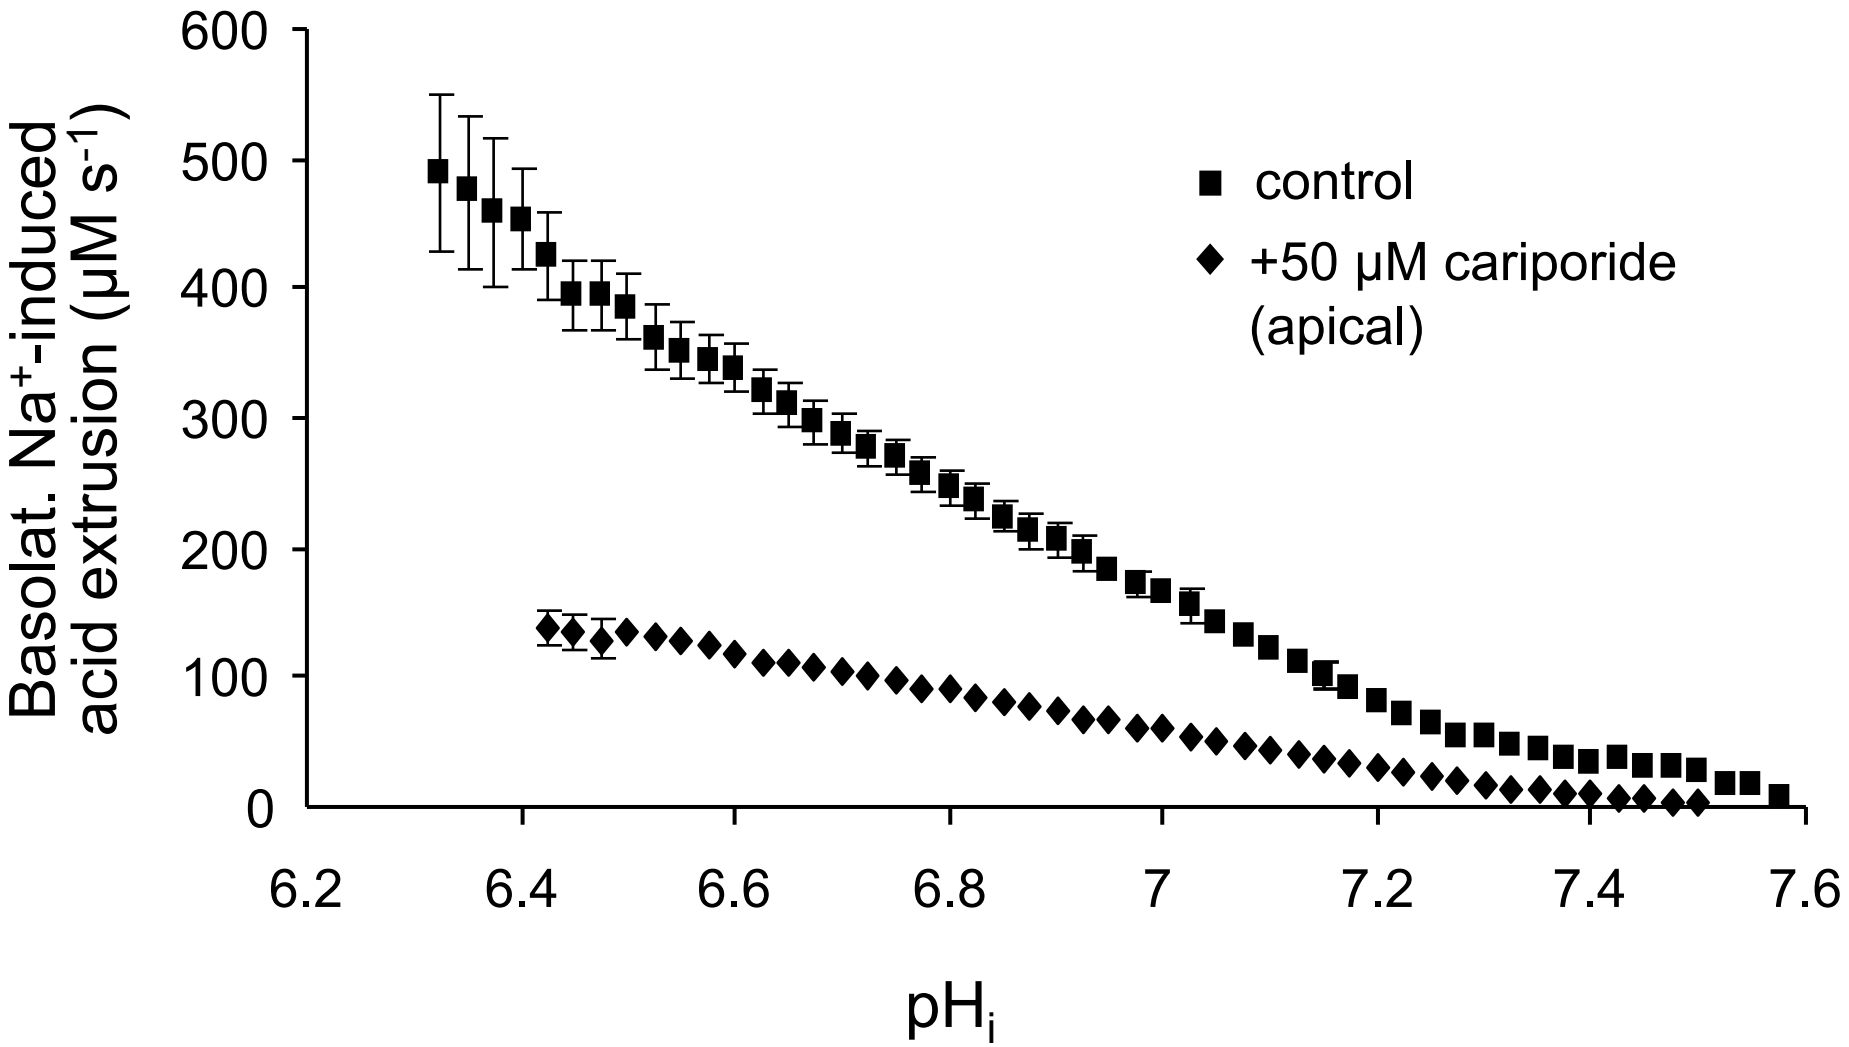

Supplement: supp_00063.2011_FigS1-S3.pdf [file supp_00063.2011_FigS1-S3.pdf]
