# Supplementary material
Source: PubMed Central journal article supplement (PMC3361997)
Supplement: supp_00063.2011_tableS1andLegends.pdf [file supp_00063.2011_tableS1andLegends.pdf]

### Supplemental Material

Supplemental Table 1. Composition of solutions (in mM) in experiments on microperfused single collecting ducts.

|                                 | Na-Ringer | 30 mM NH <sub>4</sub> Cl | 140 Na, 0 K | 0 Na, 0 K | 0 Na, 5 K | calibration pH 6.8 | calibration pH 7.8 |
|---------------------------------|-----------|--------------------------|-------------|-----------|-----------|--------------------|--------------------|
| NaCl                            | 135       |                          | 140         |           |           |                    |                    |
| NMDG-Cl                         |           | 105                      |             | 140       | 135       |                    |                    |
| K <sub>2</sub> HPO <sub>4</sub> | 2.5       | 2.5                      |             |           | 2.5       | 2.5                | 2.5                |
| NH <sub>4</sub> Cl              |           | 30                       |             |           |           |                    |                    |
| MgSO <sub>4</sub>               | 1.2       | 1.2                      | 1.2         | 1.2       | 1.2       | 1.2                | 1.2                |
| L-alanine                       | 6.0       | 6.0                      | 6.0         | 6.0       | 6.0       | 6.0                | 6.0                |
| HEPES                           | 5.0       | 5.0                      | 5.0         | 5.0       | 5.0       | 25                 | 25                 |
| CaCl <sub>2</sub>               | 2.0       | 2.0                      | 2.0         | 2.0       | 2.0       | 2.0                | 2.0                |
| glucose                         | 5.5       | 5.5                      | 5.5         | 5.5       | 5.5       |                    |                    |
| lactate                         | 4.0       | 4.0                      | 4.0         | 4.0       | 4.0       |                    |                    |
| KCl                             |           |                          |             |           |           | 125                | 125                |
| osmolality                      | ~290      | 290-300                  | ~290        | ~290      | ~290      | 290-300            | 290-300            |

Supplemental Table II. Mean urine pH and blood pH measurements from cilium knockout and control mice.

|                      | mean urine pH $\pm$ SEM |                 |                 |                 | mean blood pH $\pm$ SEM |                 |                 |                 |
|----------------------|-------------------------|-----------------|-----------------|-----------------|-------------------------|-----------------|-----------------|-----------------|
|                      | Day 7                   | Day 14          | Day 19-23       | Day 28          | Day 7                   | Day 14          | Day 19-23       | Day 28          |
| cilium knockout mice | 5.28 $\pm$ 0.05         | 5.02 $\pm$ 0.04 | 5.05 $\pm$ 0.07 | 5.34 $\pm$ 0.11 | 7.66 $\pm$ 0.05         | 7.51 $\pm$ 0.03 | 7.50 $\pm$ 0.04 | 7.50 $\pm$ 0.03 |
| control mice         | 5.60 $\pm$ 0.04         | 5.73 $\pm$ 0.04 | 6.25 $\pm$ 0.1  | 6.90 $\pm$ 0.2  | 7.60 $\pm$ 0.05         | 7.44 $\pm$ 0.03 | 7.45 $\pm$ 0.03 | 7.32 $\pm$ 0.02 |

Supplemental Figure 1. Calibrating BCECF.  $I_{495}/I_{440}$  values were converted to  $pH_i$  values using the high- $K^+$ /nigericin technique initially described by Thomas et al. (37), and modified for a one-point calibration as described by Boyarsky et al. (7). Functioning as a K-H exchange carboxylic ionophore, nigericin sets  $pH_i$  equal to  $pH_o$  if extracellular and intracellular  $K^+$  concentrations are equal. *A*. A full pH-titration curve experiment is shown for a cilium-deficient monolayer initially perfused on both sides with the standard HEPES-buffered solution to obtain a resting  $pH_i$ , and then perfused on both sides with 0  $Na^+$ /130 mM  $K^+$  solutions containing 5  $\mu M$  nigericin and different extracellular pH ( $pH_o$ ) varying from 5.5 to 8.5. *B*. From panel A-type experiments, steady-state  $I_{495}/I_{440}$  values at each pH were normalized to the mean ratio obtained from flanking exposures to the pH-7.0 solution ( $R_N$ ). As described by Boyarsky et al. (7), the following pH-titration curve was fit to  $R_N$  data using a non-linear least-squares method:

$$\frac{I_{490}}{I_{440}} = 1 + b \left[ \frac{10^{(pH-pK)}}{1+10^{(pH-pK)}} - \frac{10^{(7-pK)}}{1+10^{(7-pK)}} \right]$$

where  $b$  and  $pK$  are  $1.611 \pm 0.007$  (SD) and  $7.212 \pm 0.005$  (SD), respectively, for cilium-competent cells, and  $1.302 \pm 0.007$  (SD) and  $7.095 \pm 0.006$  (SD), respectively for cilium-deficient cells. The best-fit titration curves had lower and upper asymptotes (i.e.,  $R_{min}$  and  $R_{max}$ ) of 0.387 and 1.999, respectively, for cilium-competent cells, and 0.420 and 1.722, respectively for cilium-deficient cells. These titration-curve values allowed us to use the one-point calibration approach (7) for other experiments. More specifically, at the end of an experiment, the monolayer was perfused on both sides with the high- $K^+$ /nigericin solution at pH 7.0. All  $I_{495}/I_{440}$  values ( $R_N$ ) of that experiment were normalized to the  $I_{495}/I_{440}$  value obtained at pH 7.0, and  $pH_i$  was computed using the equation:

$$pH_i = pK + \log \left[ \frac{(R_N - R_{min})}{(R_{max} - R_N)} \right]$$

Supplemental Figure 2. Measuring intrinsic  $H^+$  buffering power.  $\beta_i$  was computed as  $\Delta[NH_4^+]_i/\Delta pH_i$  in experiments where stepwise decreases in the extracellular  $NH_3/NH_4^+$  concentration (e.g., from 20 to 10 to 5 to 2 to 1 to 0 mM) on both sides of the monolayer elicited corresponding decreases in  $pH_i$  while both sides of the monolayer were exposed to a  $Na^+$ -free solution to minimize acid-base transporter activity (7).  $\beta_i$  vs. the average  $pH_i$  before and after each step change in  $NH_3/NH_4^+$  exhibited a  $pH_i$  dependence that was best fit with the line  $\beta_i = -13.0 \times pH_i + 105.2$  for the cilium-deficient cells, and  $\beta_i = -7.1 \times pH_i + 68.8$  for the cilium-competent cells. Although the slopes and y-intercepts were somewhat different for the two lines,  $\beta_i$  values were similar in the  $pH_i$  range during  $pH_i$  recoveries from acid loads.

Supplemental Figure 3. Apical cariporide inhibition of basolateral  $Na^+$ -induced acid extrusion in cilium-competent monolayers. *A*:  $pH_i$  recovery from an acid load in the presence and absence of cariporide.  $pH_i$  stabilized at the beginning of the experiment with both the apical and basolateral membranes bathed in the standard HEPES-buffered solution (*ab*). The cells were acid loaded by first applying and then removing a  $Na^+$ -free solution containing 20 mM  $NH_4Cl$  on both the apical and basolateral membranes (*bcde*). Following the acid load, there was little  $pH_i$  recovery in the continued absence of external  $Na^+$  (*ef*). As expected, returning apical  $Na^+$  in the continued absence of basolateral  $Na^+$  had little effect on the slow  $pH_i$  recovery (*fg*). Returning basolateral  $Na^+$  initiated an increase in  $pH_i$  that was slowed by applying apical cariporide (50  $\mu M$ ) ~12 s later (*gh*). Removing cariporide had little effect on  $pH_i$  (*hi*). In another experiment, the basolateral  $Na^+$ -induced  $pH_i$  recovery was considerably faster (*g'h'*) in the absence of cariporide. For clarity, we only show the  $pH_i$  vs. time trace immediately prior to returning basolateral  $Na^+$ . *B*:  $pH_i$  dependence of basolateral  $Na^+$ -induced acid extrusion. Total acid extrusion  $\pm$  cariporide was calculated from the segment-*gh/g'h'*  $pH_i$  recoveries in experiments similar to those shown in panel A.  $n \geq 3$  for each symbol.
